# Supplementary material for: Call to Establish Public Policy for Regulating the Congestion in Delivery Rooms in Israel - Alternatives, Consequences, and Recommendations
Source: Preprints.org preprint supplement (doi:10.20944/preprints202405.0038.v1), 2024-05-02
Supplement: Supplementary file 3 [file supplementary]

**Appendix**

**Table 3: Hospital Employments- Density per 1,000 Population, at Years 2010-2022 (Head Counts).**

| **2022** | **2021** | **2020** | **2019** | **2018** | **2017** | **2016** | **2015** | **2014** | **2013** | **2012** | **2011** | **2010** |  |
| --- | --- | --- | --- | --- | --- | --- | --- | --- | --- | --- | --- | --- | --- |
| N.A | 13.7 | 13.78 | 13.69 | 13.42 | 13.41 | 13.29 | 13.29 | 13.27 | 13.11 | 13.05 | 12.9 | 12.7 | Austria |
| N.A | 17.78 | 17.54 | 17.11 | 16.57 | 16.48 | 16.26 | 16.1 | 16.04 | 15.98 | 15.75 | 15.56 | 15.09 | Germany |
| N.A | 22.7 | 21.17 | 20.63 | 20.59 | 20.6 | 20.59 | 20.79 | 21.03 | 20.89 | 20.46 | 20.45 | 20.78 | Denmark |
| N.A | N.A | 11.01 | 10.72 | 10.52 | 10.34 | 10.34 | 10.29 | 10.37 | 10.62 | 10.73 | 10.95 | 11.08 | Italy |
| 11.71 | 11.53 | 11.31 | 10.3 | 11.11 | 10.9 | 10.62 | 10.69 | 11.22 | 10.89 | 11.34 | 11.34 | 11.73 | **Israel** |
| N.A | 14.18 | 13.58 | 12.78 | 12.59 | 12.27 | 11.95 | 11.76 | 11.58 | 11.3 | 11.33 | 11.56 | 11.71 | Spain |
| N.A | 24.66 | 23.5 | 23.11 | 22.48 | 22.16 | 22.19 | 21.92 | 21.68 | 21.48 | 21.43 | 22.27 | 23.03 | United Kingdom |
| N.A | 21.25 | 21.19 | 21.36 | 21.15 | 21.02 | 20.13 | 19.65 | 19.51 | 19.57 | 19.59 | 19.50 | 19.57 | United States |

**Source: OECD Statistics** <https://stats.oecd.org/Index.aspx?DataSetCode=SHA>

**Table 4: Employed Doctors - Density per 1,000 Population, at Years 2010-2021**

| **2021** | **2020** | **2019** | **2018** | **2017** | **2016** | **2015** | **2014** | **2013** | **2012** | **2011** | **2010** |  |
| --- | --- | --- | --- | --- | --- | --- | --- | --- | --- | --- | --- | --- |
| 3.19 | 3.38 | 3.29 | 3.22 | 3.14 | 3.08 | 3.07 | 2.98 | 2.94 | 2.97 | 3.00 | 3.01 | Israel |
| 3.5 | 3.5 | 3.56 | 3.50 | 3.44 | 3.35 | 3.32 | 3.25 | 3.23 | 3.15 | 3.19 | 3.12 | Average OECD |

**Source:** Israeli Ministry of Health : Labor force in the health professions. <https://www.health.gov.il/UnitsOffice/HD/MTI/info/Pages/manpower.aspx>

**Table 5: Hospital Professional Nursing Workers - Density per 1,000 Population, at Years 2010-2022 (Head Counts).**

| **2022** | **2021** | **2020** | **2019** | **2018** | **2017** | **2016** | **2015** | **2014** | **2013** | **2012** | **2011** | **2010** |  |
| --- | --- | --- | --- | --- | --- | --- | --- | --- | --- | --- | --- | --- | --- |
| N.A | 10.79 | 10.32 | 10.29 | 6.85 | 6.85 | 6.77 | 6.8 | 6.79 | 6.69 | 6.75 | 6.62 | 6.53 | Austria |
| N.A | 12.03 | 12.06 | 11.78 | 11.52 | 11.05 | 10.84 | 10.71 | 10.69 | 10.52 | 10.17 | 10.13 | 9.84 | Germany |
| N.A | N.A | 10.24 | 10.13 | 10.1 | 10.03 | 9.95 | 9.92 | 9.93 | 9.95 | 9.96 | 9.87 | 9.82 | Denmark |
| N.A | 6.21 | 6.28 | 6.16 | 5.74 | 5.8 | 5.57 | 5.44 | 5.28 | 5.08 | 5.11 | 5.2 | 5.23 | Italy |
| N.A | 5.09 | 4.87 | 4.72 | 4.64 | 4.63 | 4.48 | 4.32 | 4.3 | 4.32 | 4.25 | 4.17 | 4.04 | **Israel** |
| N.A | 6.34 | 6.1 | 5.89 | 5.87 | 5.74 | 5.51 | 5.29 | 5.15 | 5.14 | 5.24 | 5.22 | 5.15 | Spain |
| 6.91 | 6.94 | 6.78 | 66.1 | 6.5 | 6.41 | 6.45 | 6.45 | 6.46 | 6.44 | 6.42 | 6.59 | 6.68 | United Kingdom |

**Source: OECD** Statistics <https://stats.oecd.org/Index.aspx?DataSetCode=SHA>

**Table 6: Hospital Beds at Years 2010-2022 (per 1,000 Population).**

| **2022** | **2021** | **2020** | **2019** | **2018** | **2017** | **2016** | **2015** | **2014** | **2013** | **2012** | **2011** | **2010** |  |
| --- | --- | --- | --- | --- | --- | --- | --- | --- | --- | --- | --- | --- | --- |
| N.A | 6.91 | 7.05 | 7.19 | 7.27 | 7.37 | 7.42 | 7.54 | 7.58 | 7.64 | 7.67 | 7.68 | 7.65 | Austria |
| N.A | 7.76 | 7.82 | 7.91 | 7.98 | 8.00 | 8.06 | 8.13 | 8.23 | 8.29 | 8.34 | 8.38 | 8.25 | Germany |
| N.A | 2.52 | 2.59 | 2.59 | 2.61 | 2.61 | 2.6 | 2.53 | 2.69 | 3.07 | N.A | 3.13 | 3.05 | Denmark |
| N.A | 3.12 | 3.19 | 3.16 | 3.14 | 3.18 | 3.17 | 3.2 | 3.21 | 3.31 | 3.42 | 3.52 | 3.64 | Italy |
| 2.99 | 2.91 | 2.92 | 2.96 | 2.96 | 3.00 | 2.97 | 3.00 | 3.05 | 3.07 | 3.07 | 3.11 | 3.13 | **Israel** |
| N.A | 2.96 | 2.96 | 2.95 | 2.97 | 2.97 | 2.97 | 2.98 | 2.97 | 2.96 | 2.99 | 3.05 | 3.11 | Spain |
| 2.44 | 2.42 | 2.43 | 2.45 | 2.5 | 2.54 | 2.57 | 2.61 | 2.73 | 2.76 | 2.81 | 2.88 | 2.93 | United Kingdom |
| N.A | 2.77 | 2.78 | 2.8 | 2.83 | 2.87 | 2.77 | 2.8 | 2.83 | 2.89 | 2.93 | 2.97 | 3.05 | United States |

**Source: OECD Statistics** <https://stats.oecd.org/Index.aspx?DataSetCode=SHA>

**Table 7: Quality Indices in Hospitals in Israel: Duration of Treatment** (In Minutes)

| **2020** | **2019** | **2018** | **2017** | **2016** | **2015** |  |
| --- | --- | --- | --- | --- | --- | --- |
| 27 | 28 | 29 | 33 | 38 | 55 | Median time from Hospital admission to performing MRI / CT head. |
| 9 | 9 | 10 | 10 | N.A | N.A | Median time from arrival at the emergency room to clinical examination. |

**Source:** Ministry of Health: National Program for Quality Indices. Report for the years 2013-2020.[[1]](#footnote-1)

1. <https://www.gov.il/he/Departments/publications/reports/quality-national-prog-2013-2020>

   [↑](#footnote-ref-1)
